# Supplementary material
Source: MDPI journal article supplement (https://www.mdpi.com/2304-6740/11/5/195)
Supplement: s1 [file s1]

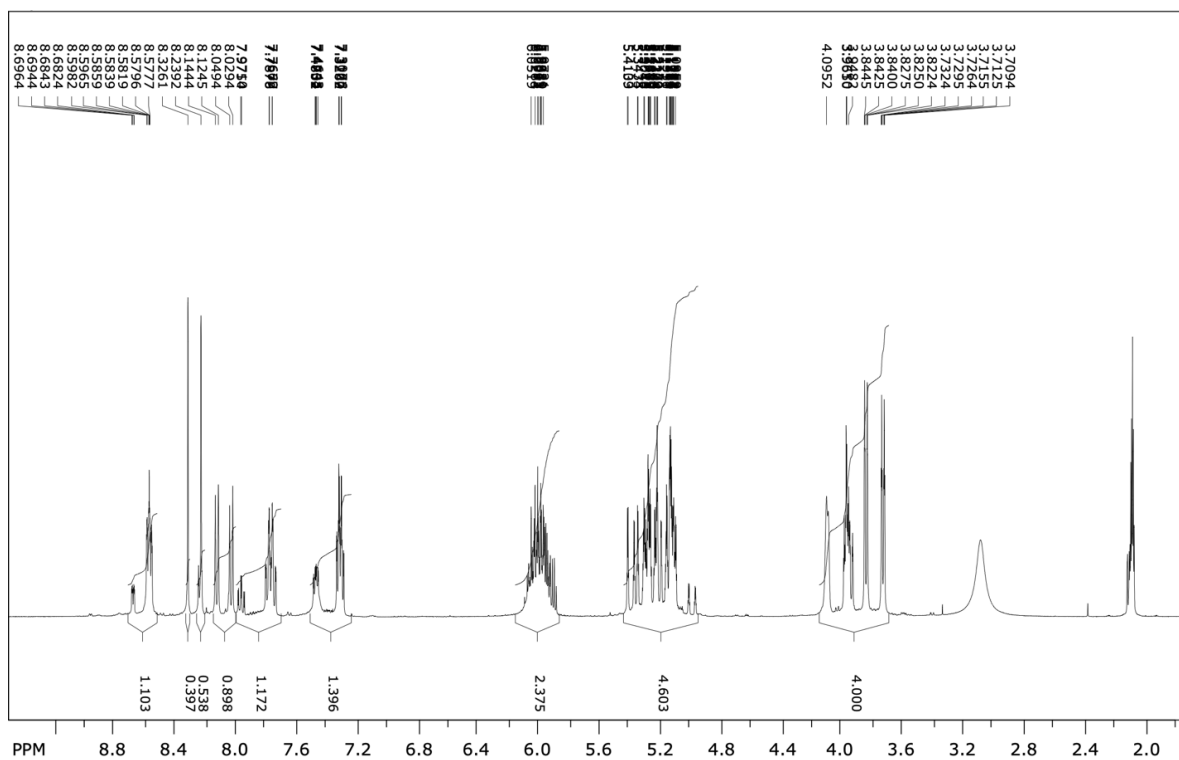

Figure S1. <sup>1</sup>H NMR spectrum of 2-formylpyridine *N*<sup>4</sup>,*S*-diallylthiosemicarbazone (HL<sup>1</sup>) in acetone-d<sub>6</sub>.

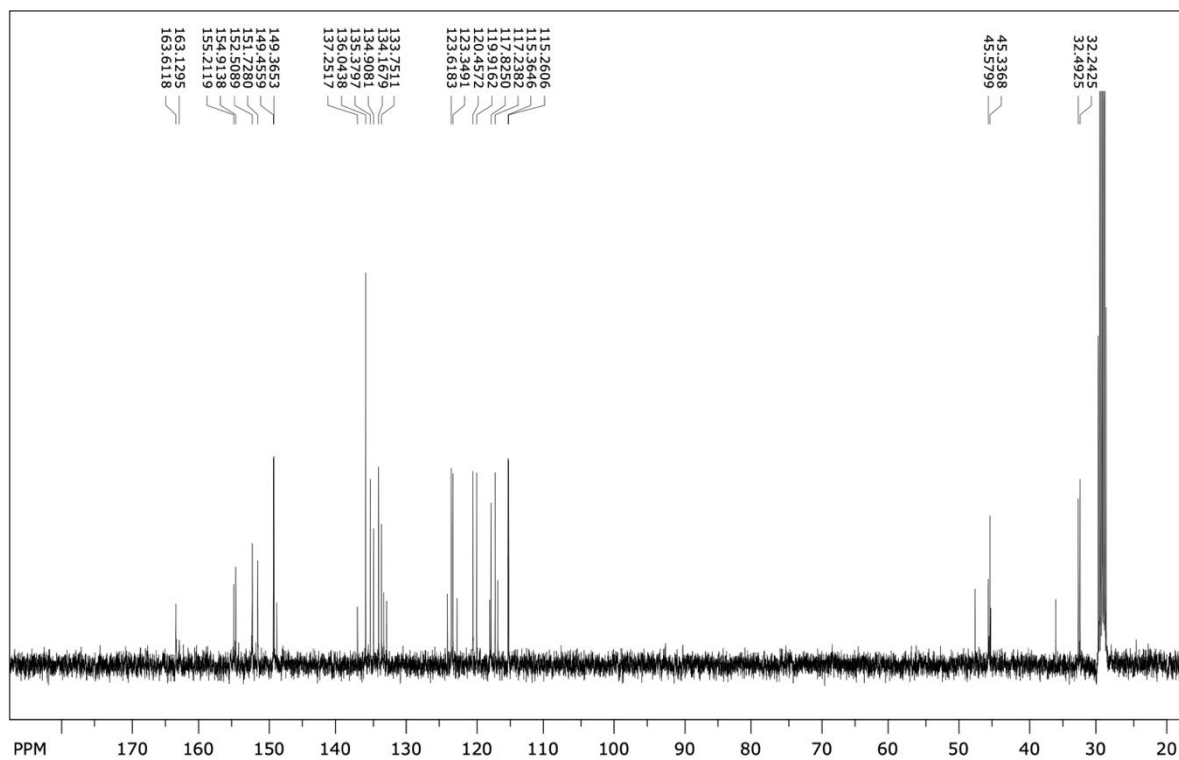

Figure S2. <sup>13</sup>C NMR spectrum of 2-formylpyridine *N*<sup>4</sup>,*S*-diallylthiosemicarbazone (HL<sup>1</sup>) in acetone-d<sub>6</sub>.

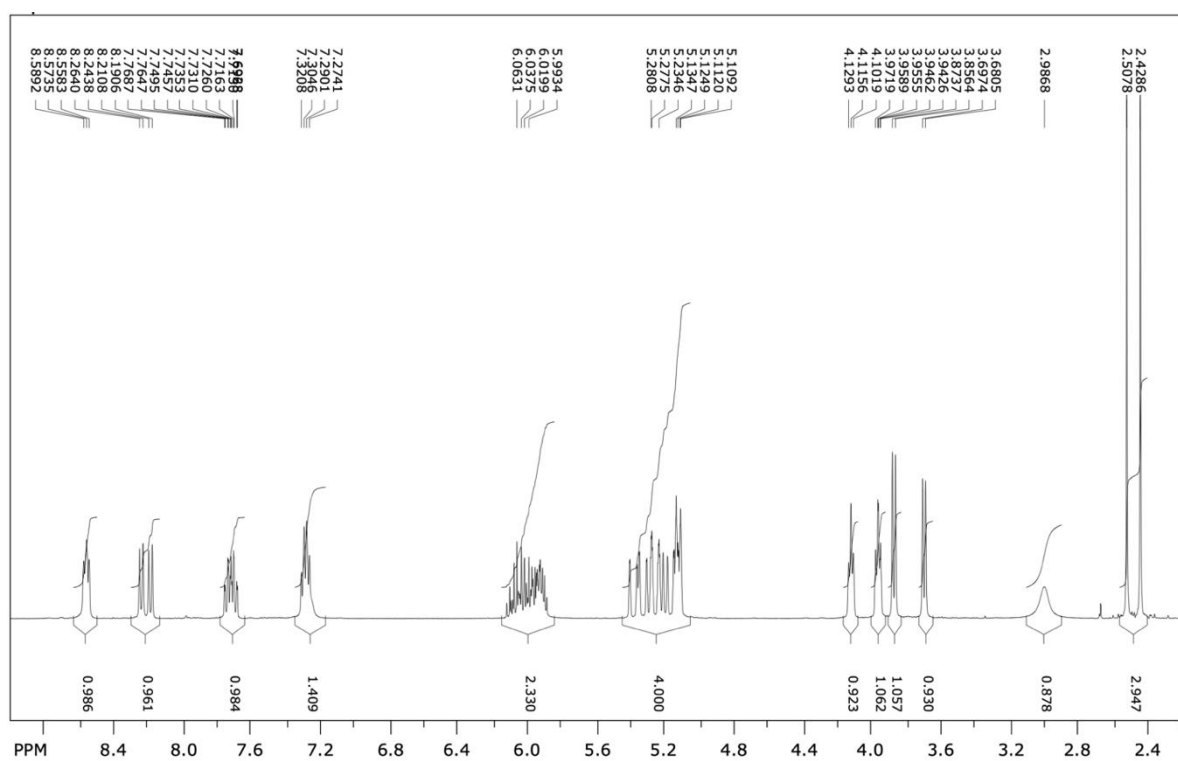

Figure S3. <sup>1</sup>H NMR spectrum of 2-acetylpyridine *N*<sup>4</sup>,*S*-diallylthiosemicarbazone (HL<sup>2</sup>) in acetone-d<sub>6</sub>.

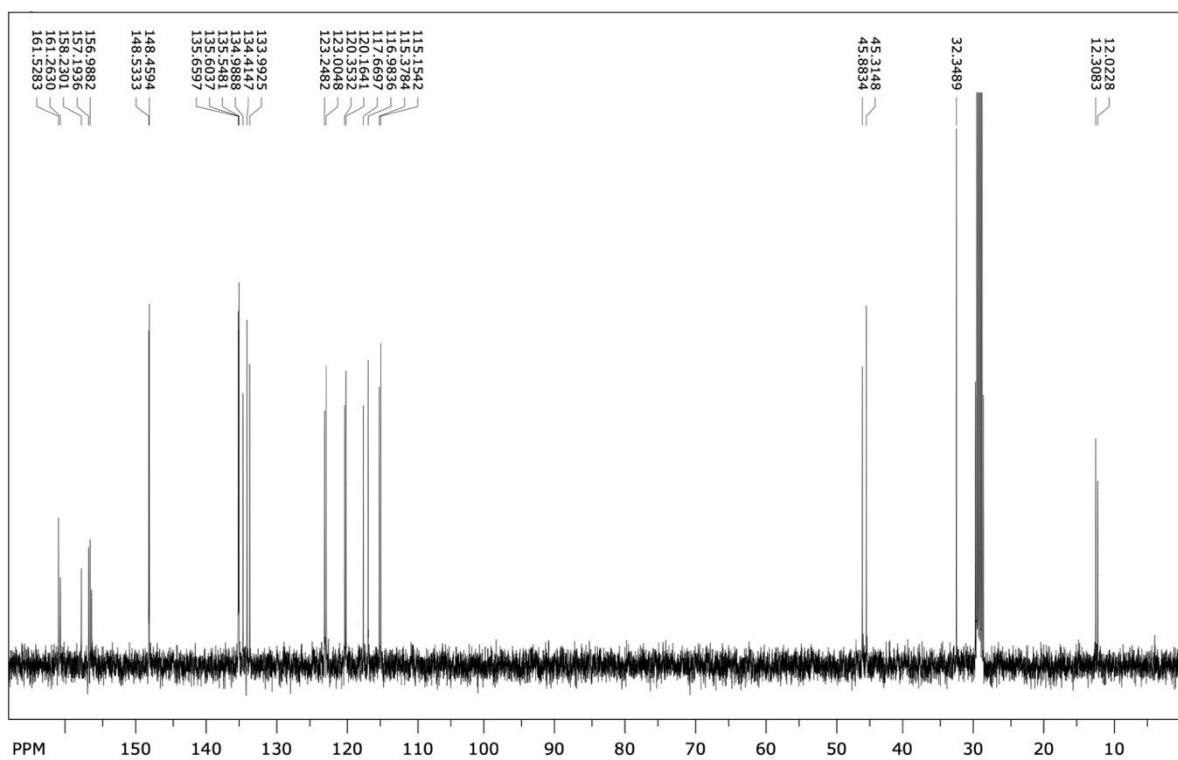

Figure S4. <sup>13</sup>C NMR spectrum of 2-acetylpyridine *N*<sup>4</sup>,*S*-diallylthiosemicarbazone (HL<sup>2</sup>) in acetone-d<sub>6</sub>.

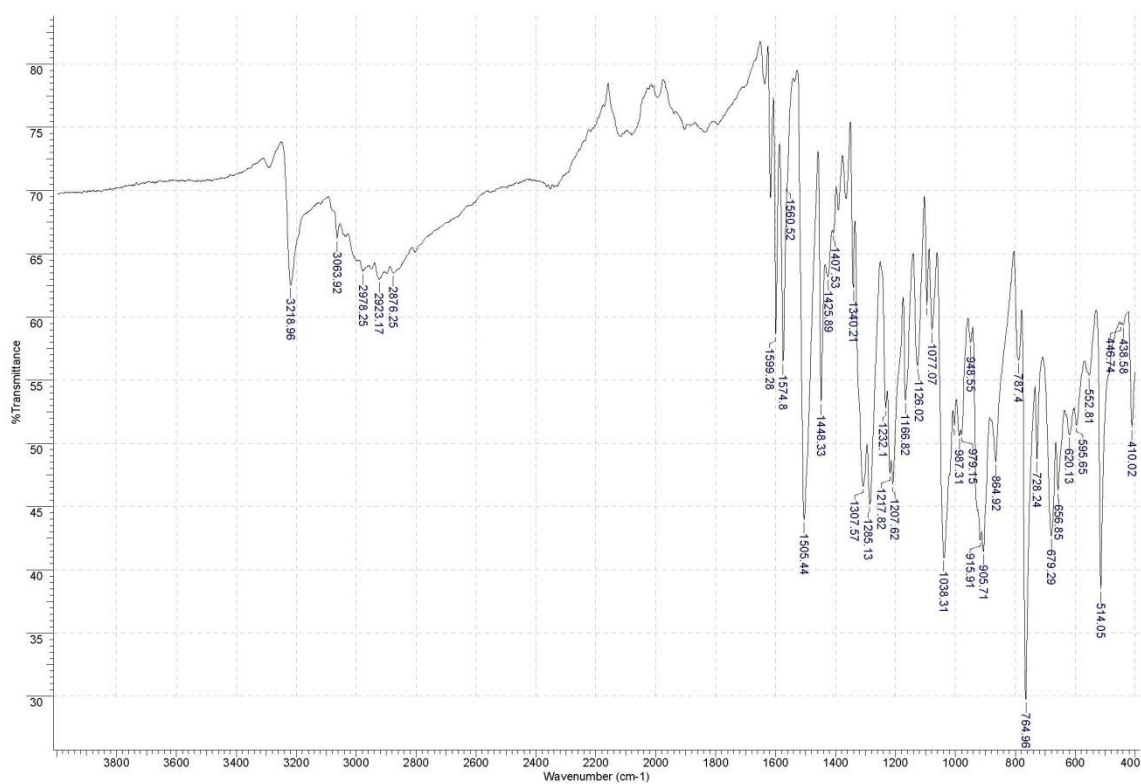

Figure S5. FTIR spectrum of HL<sup>1</sup>.

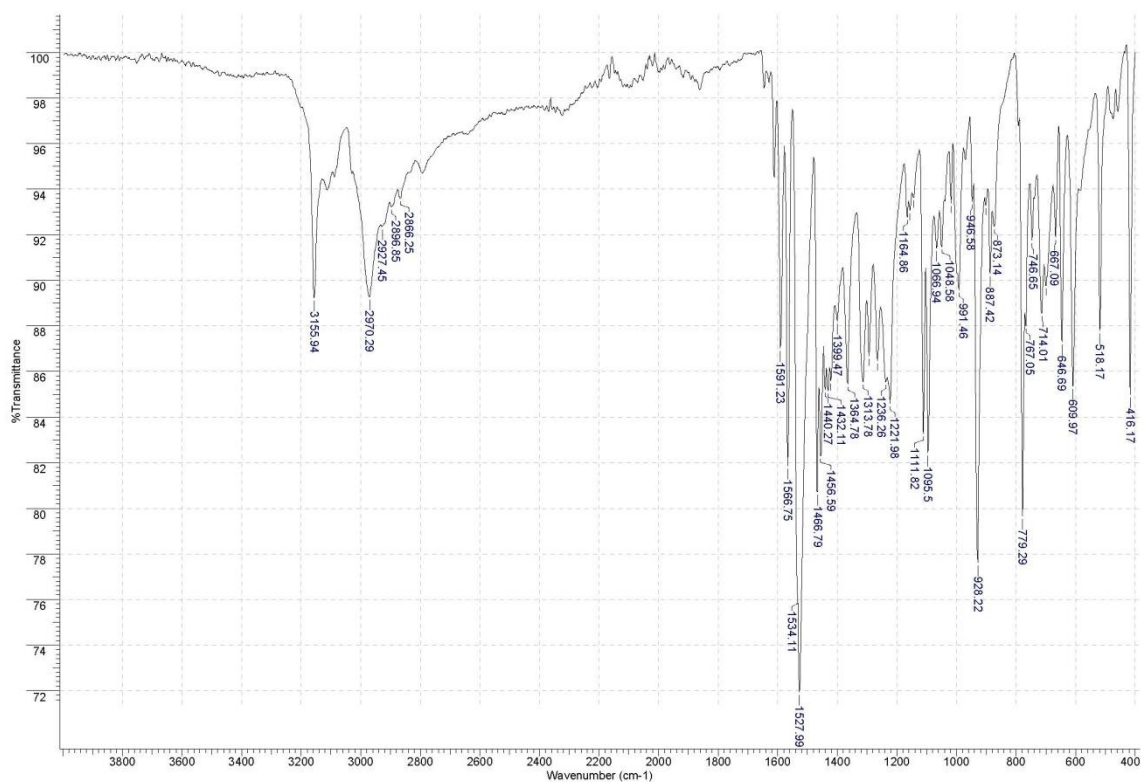

Figure S6. FTIR spectrum of **1**.

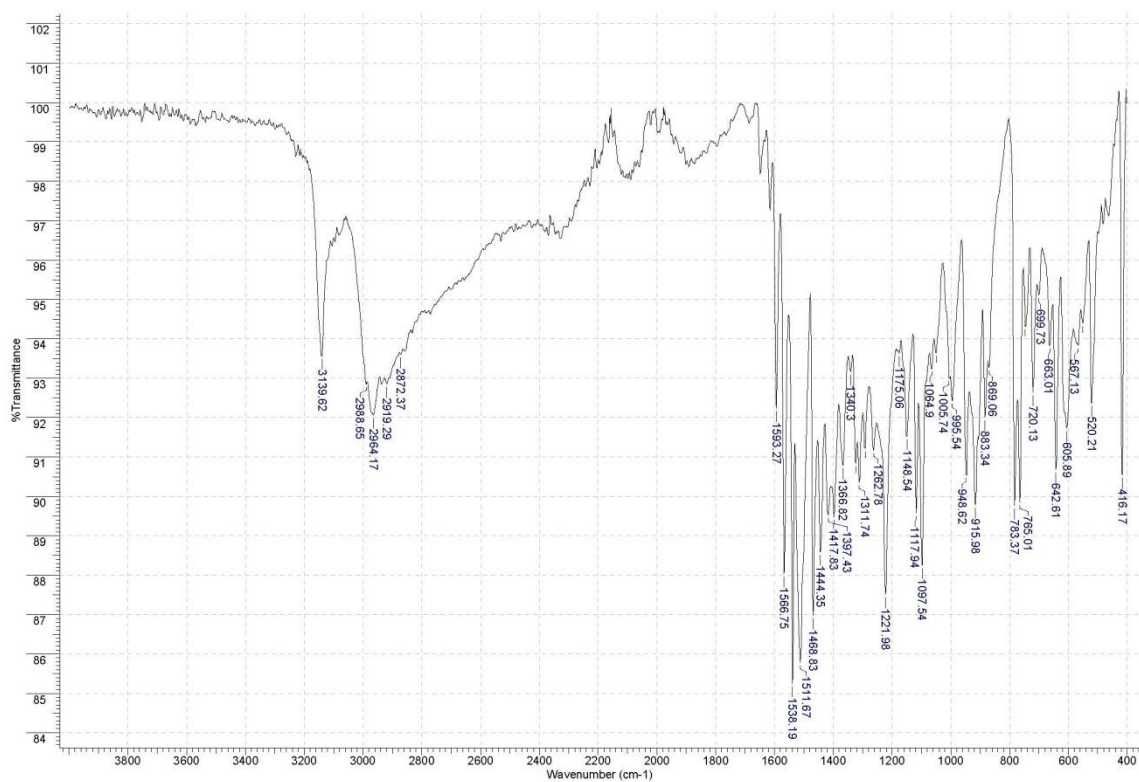

Figure S7. FTIR spectrum of **2**.

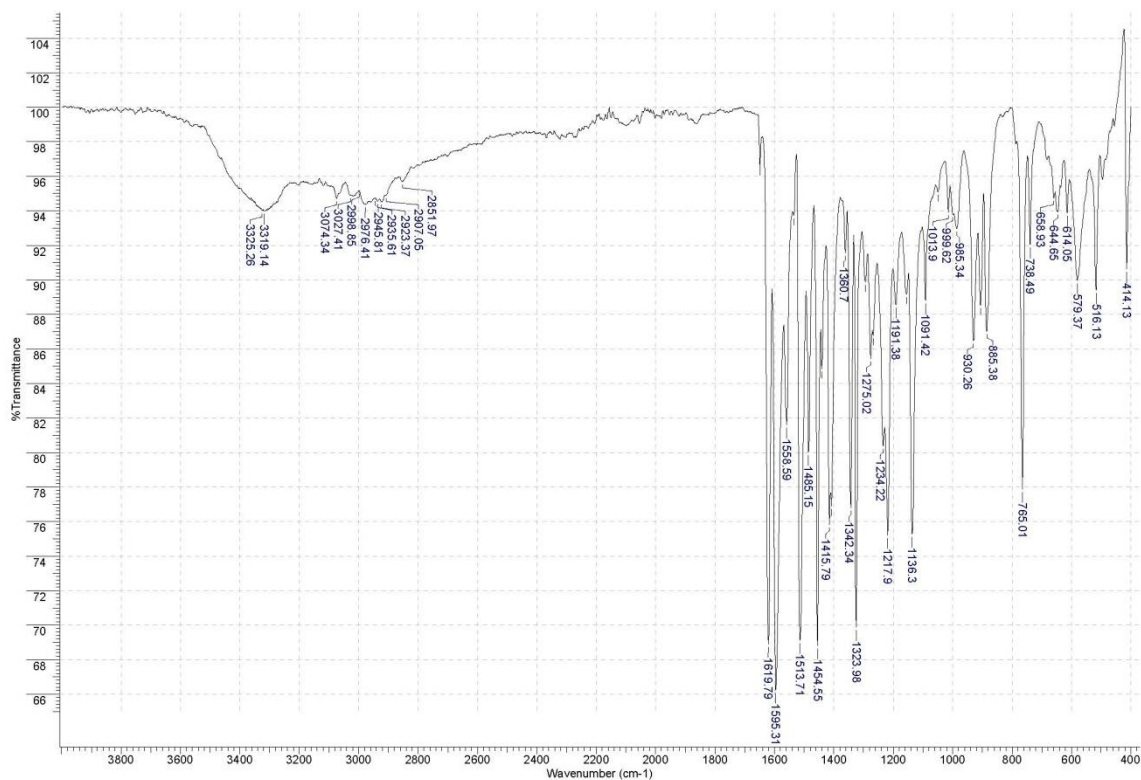

Figure S8. FTIR spectrum of **3**.

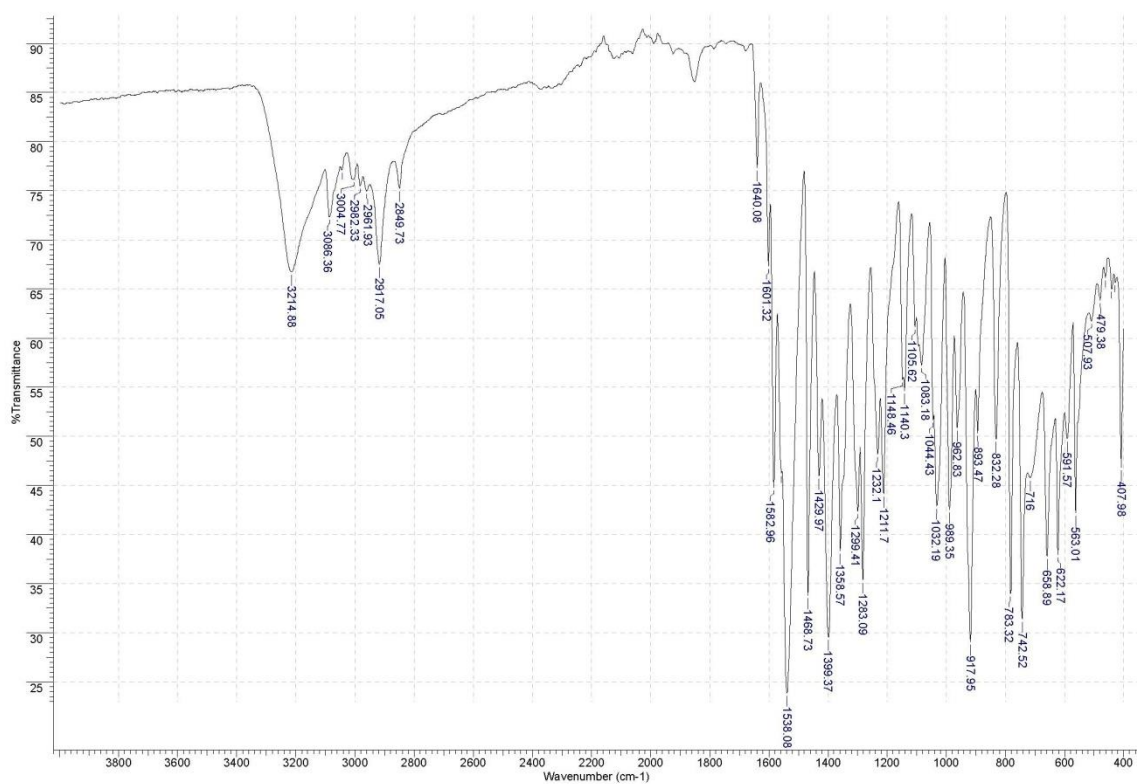

Figure S9. FTIR spectrum of HL<sup>2</sup>.

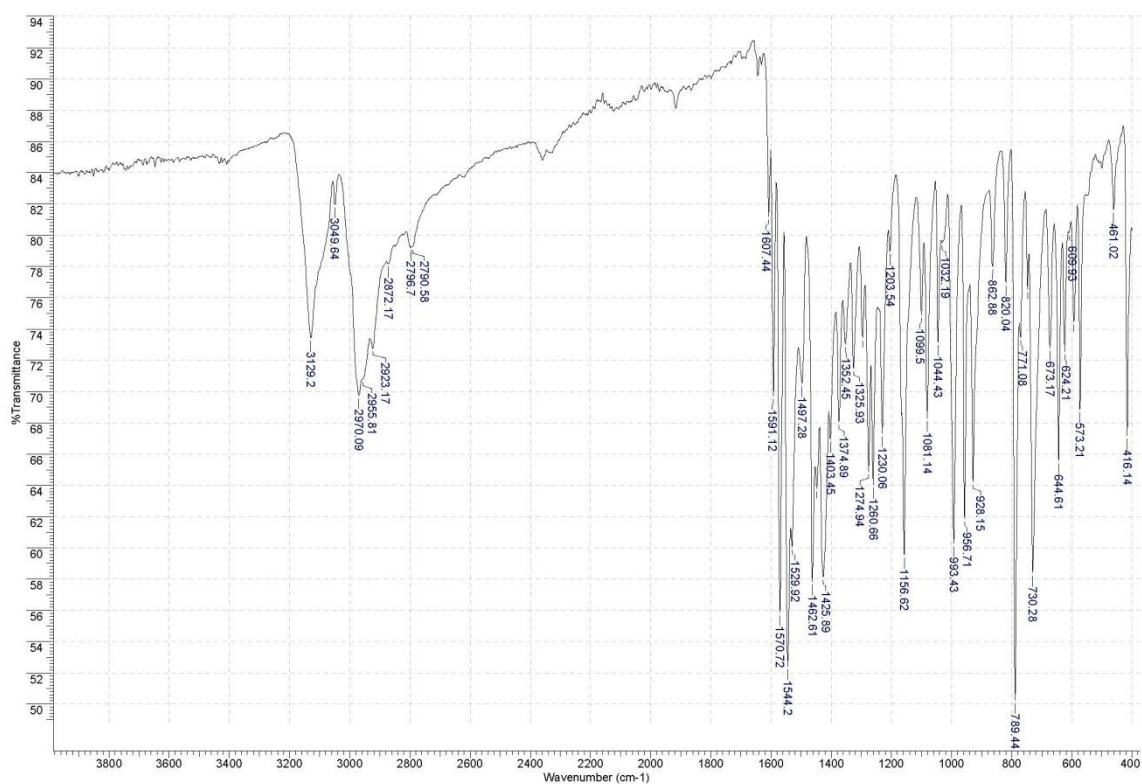

Figure S10. FTIR spectrum of 4.

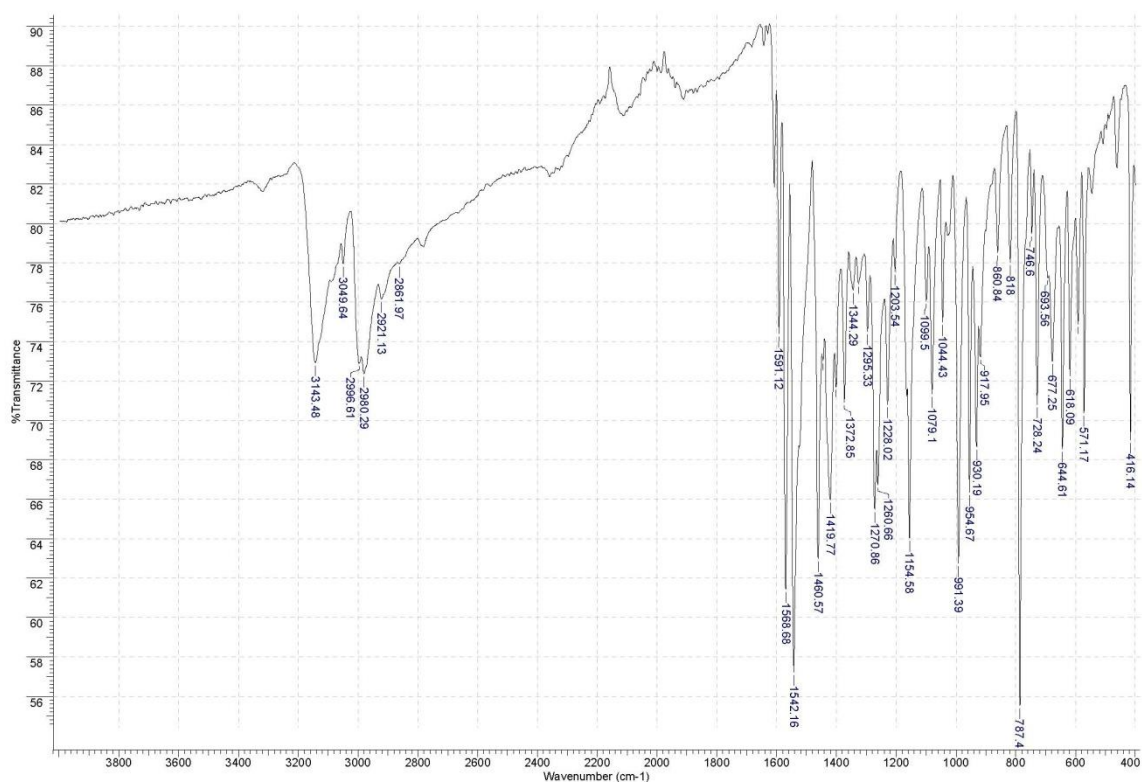

Figure S11. FTIR spectrum of **5**.

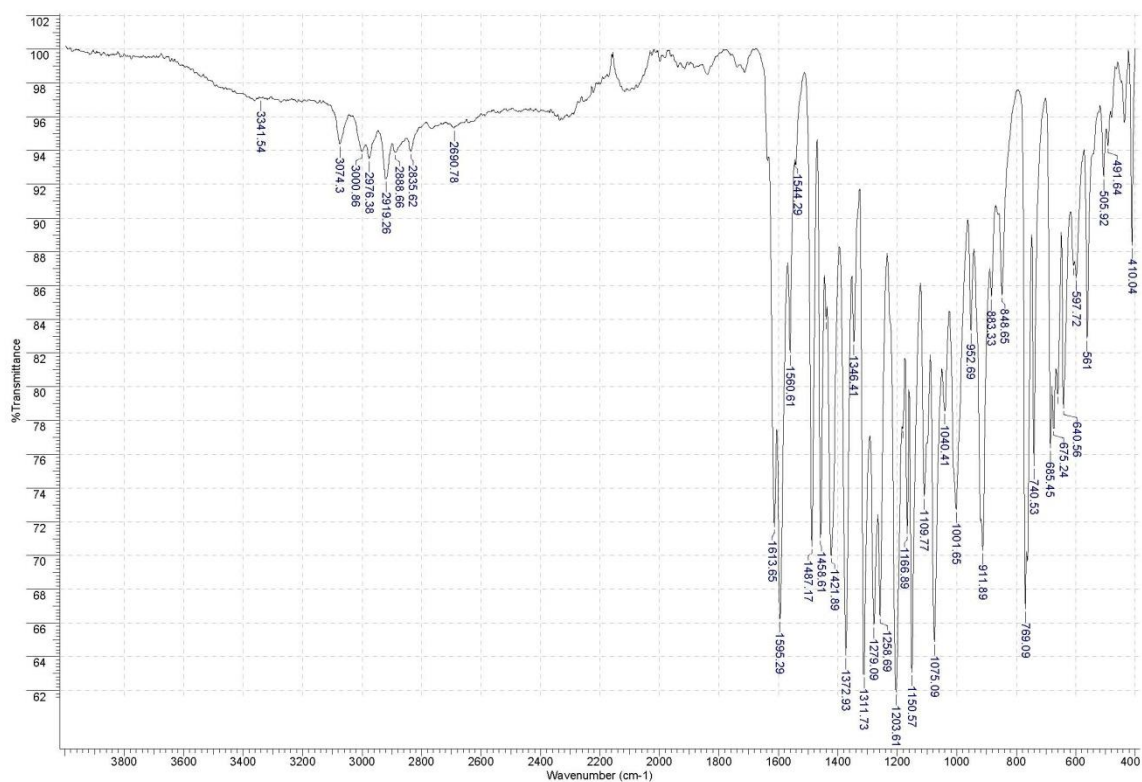

Figure S12. FTIR spectrum of **6**.
